# Supplementary material for: Measurement of the cellular deacetylase activity of SIRT1 on p53 via LanthaScreen® technology
Source: Royal Society of Chemistry journal article supplement (doi:10.1039/c0mb00026d), 2010-10-08

**Supplementary Figure 1: Western blot analysis to confirm the SIRT1 protein expression.** Indicated amount of SIRT1 BacMam virus (v/v) was used to transduce U-2OS cells in 6-well plate. 24 hours later, cell lysates were harvest and subjected to SIRT1 Western blot analysis as described in *Experimental*.

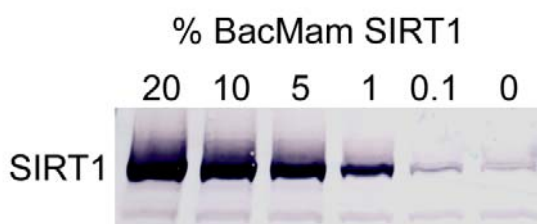

**Supplementary Figure 2: Measurement of p53 acetylation at Lys382 in other cell backgrounds.** Treatment of BacMam p53 pre-transduced HCT-116 (A) and PC3 (B) cells with serially-diluted EX-527 (in the presence of 1  $\mu$ M TSA) resulted in dose-dependent increases in acetyl-p53 (Lys382) TR-FRET signal. Values represent the average of at least 4 data points,  $\pm$  S.E.

A.

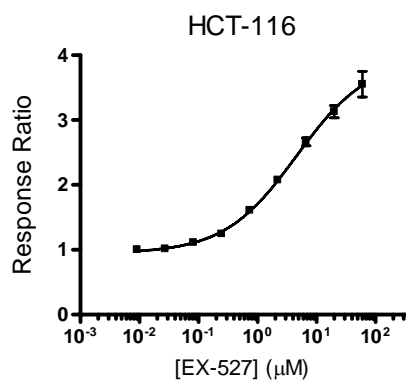

B.

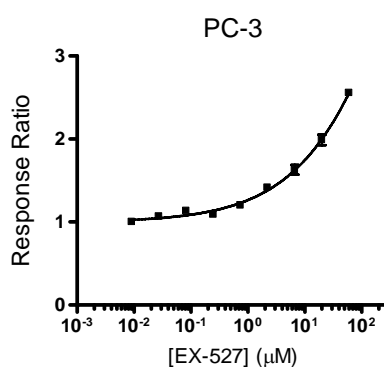

Supplement: c0mb00026d.pdf [file c0mb00026d.pdf]
